# Supplementary material for: Origin of Sn(ii) oxidation in tin halide perovskites
Source: Royal Society of Chemistry journal article supplement (doi:10.1039/d0ma00245c), 2020-01-01
Supplement: d0ma00245c1.pdf [file d0ma00245c1.pdf]

## Supporting Information

### Materials

All chemicals were used as received. The perovskite solutions were prepared in a N<sub>2</sub>-filled glove box from 1.2 M of SnI<sub>2</sub> (Tokyo Chemical Industry), and formamidinium iodide (FAI, Dyenamo), methylammonium iodide (MAI, Dyenamo) or CsI (abcr GmbH, 99.999%) in DMSO-d<sub>6</sub> (Sigma) or DMF-d<sub>7</sub> (Sigma). The different additives were dissolved from SnI<sub>2</sub> or FASnI<sub>3</sub> solutions: SnI<sub>4</sub> (Sigma), SnF<sub>2</sub> (Aldrich), I<sub>2</sub> (Sigma, beads) and dimethyl sulfide (Sigma).

### Preparation of solutions

All solutions were prepared in N<sub>2</sub>-filled glove box. Solutions suffered no air exposure during preparation or transport to characterization instruments.

SnI<sub>2</sub> solutions of different molarity (0.01-1.2 M) were prepared dissolving the powder in the corresponding volume of solvent (DMSO or DMF).

1 M FASnI<sub>3</sub>, MASnI<sub>3</sub> and CsSnI<sub>3</sub> solutions in DMSO and DMF were prepared by preparing nominal 1.2 M stock solutions of SnI<sub>2</sub> in the corresponding solvent, and adding the corresponding volume to previously weighed FAI, MAI or CsI powder in 1:1 stoichiometry.

10% SnF<sub>2</sub>-containing solutions were prepared by preparing a 0.4 M stock solution of SnF<sub>2</sub> in DMSO and adding the corresponding volume to the 1 M FASnI<sub>3</sub> solution in DMSO for a final 0.8 M solution with 10% of SnF<sub>2</sub>.

DMS-containing solutions were prepared by adding 73 µL to 1 mL of 1 M FASnI<sub>3</sub> solution in DMSO.

1% SnI<sub>4</sub>-containing solutions were prepared by dissolving 6.26 mg of SnI<sub>4</sub> in 1 mL of 1 M FASnI<sub>3</sub> solution in DMSO.

10% I<sub>2</sub>-containing solutions were prepared by dissolving 25.4 mg of I<sub>2</sub> in 1 mL of 1 M FASnI<sub>3</sub> solution in DMSO.

### Methods

#### *Solid-state <sup>119</sup>Sn-NMR*

The spectra were collected on a Bruker Avance II 400 spectrometer equipped with a 4 mm broadband Magic Angle Spinning (MAS) probe. Powder samples were packed in 4 mm zirconia rotors sealed with Vespel caps and spun at a rate of 12 or 13 kHz. A Direct Polarization (DP) scheme was applied, with a  $\pi/2$  pulse width of 4 µs, a recycle delay of 40 s and averaging over 4096 scans.

### *Liquid-state $^{119}\text{Sn}$ -NMR*

The spectra were all acquired on a Bruker AVII 400 MHz or Bruker AVIII 500 MHz equipped with room-temperature TBO or BBO-probe heads respectively. Typically, a sweep width of 504.3 ppm was used and 64k points were acquired, resulting in a total acquisition time of 435.81 ms. The centre frequency had to be adjusted from sample to sample in order to detect the desired signal, therefore, on new samples, a full scan of the possible shift range was acquired (1000 to -3000ppm). We used a 30° pulse in order to minimize the recycle delay down to 2s. The number of scans thus ranged from 128 for very concentrated samples to 16k scans for very dilute samples.

### *Liquid-state $^1\text{H}$ - and $^{13}\text{C}$ -NMR*

All other spectra were measured with standardized parameter sets from Bruker Topspin version 2.1 (AV400) and 3.0 (AV500).

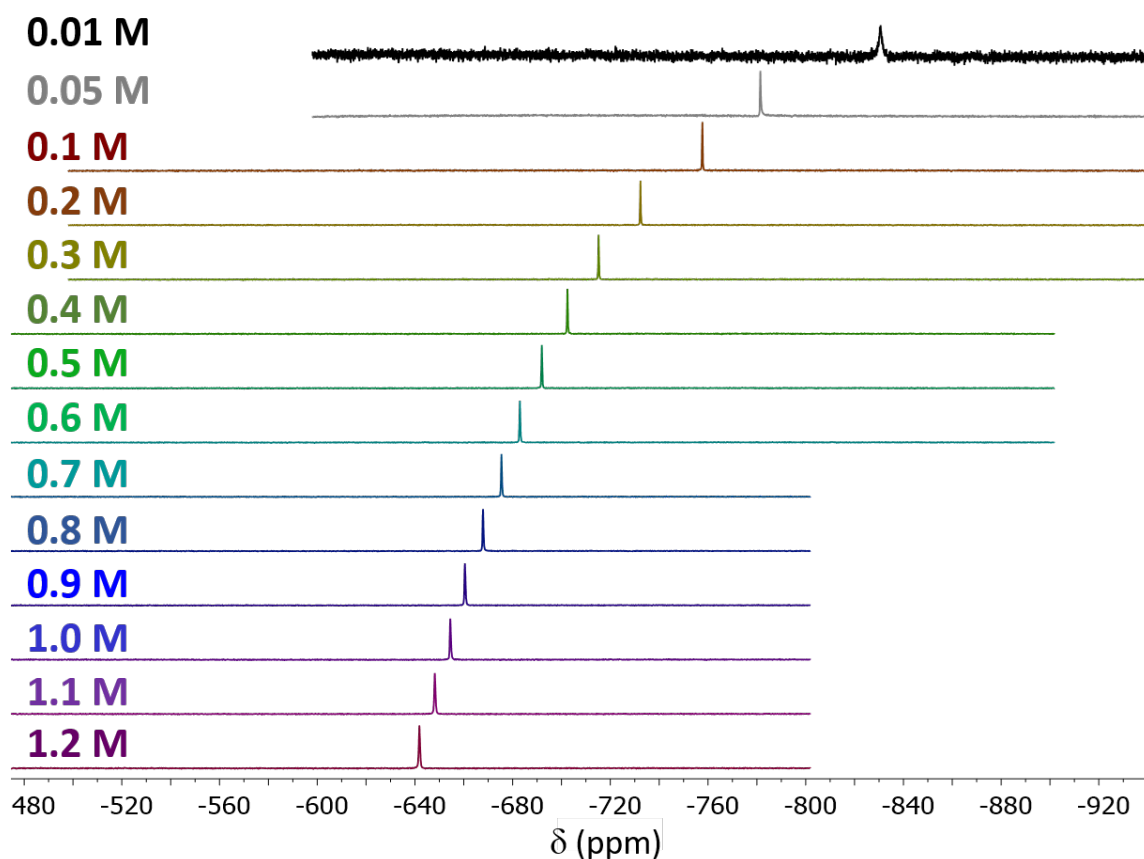

**Figure S1.**  $^{119}\text{Sn}$ -NMR  $\text{Sn(II)}$  signal chemical shift for  $\text{SnI}_2$  in DMSO at different solution concentrations.

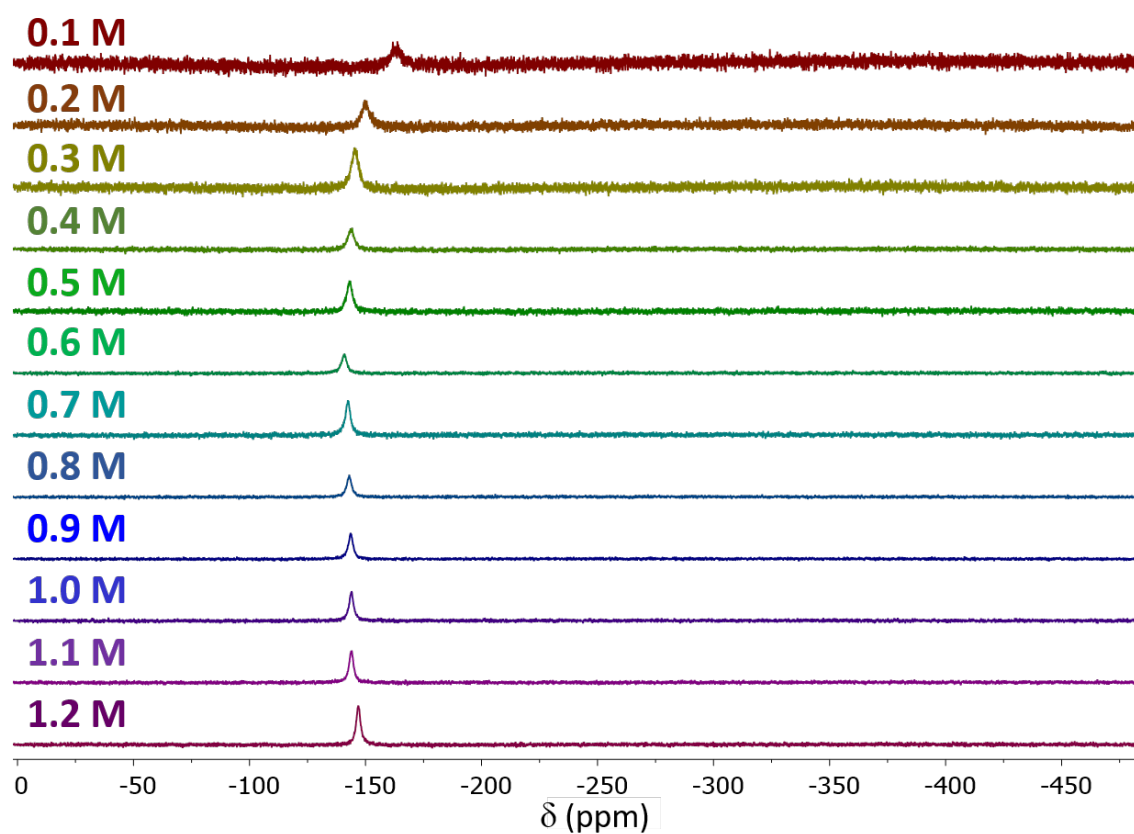

**Figure S2.**  $^{119}\text{Sn}$ -NMR  $\text{Sn(II)}$  signal chemical shift for  $\text{SnI}_2$  in DMF at different solution concentrations.

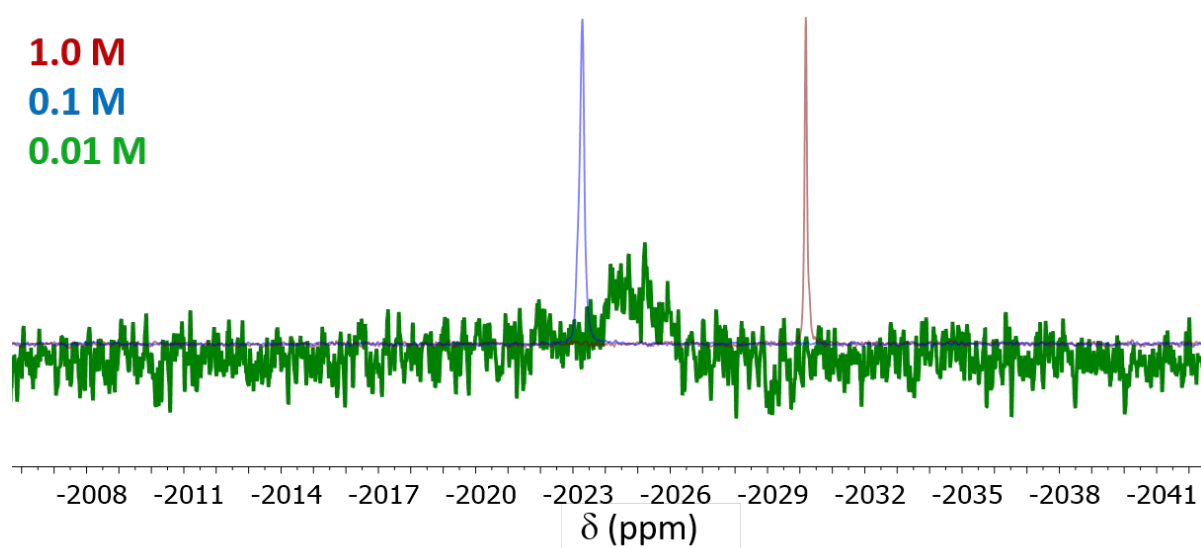

**Figure S3.**  $^{119}\text{Sn}$ -NMR  $\text{Sn(IV)}$  signal for  $\text{SnI}_4$  in DMSO at different solution concentrations.

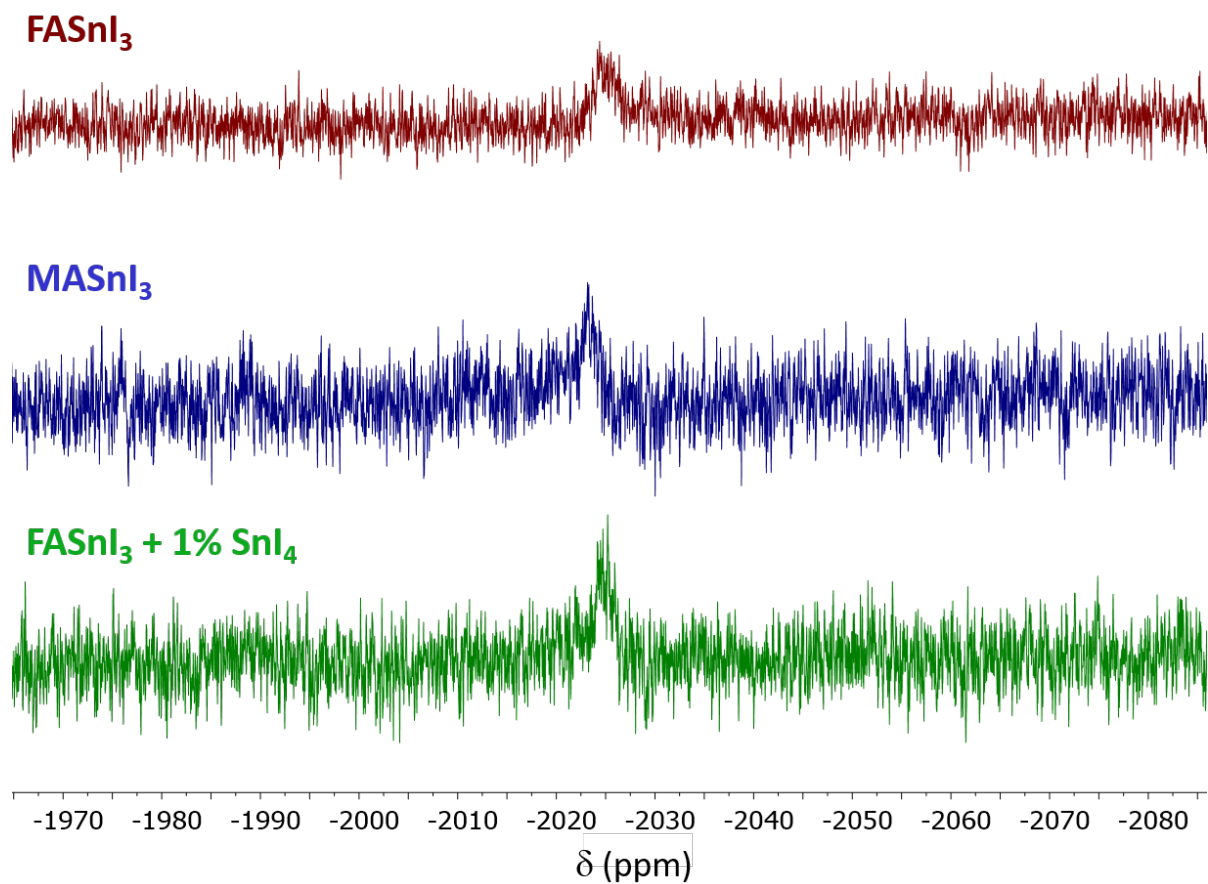

**Figure S4.**  $^{119}\text{Sn}$ -NMR Sn(IV) signal for FASnI<sub>3</sub> and MASnI<sub>3</sub> after 30 min at 100°C and FASnI<sub>3</sub> with 1%mol of SnI<sub>4</sub> in DMSO at 1M. All measurements were carried out with the same sensitivity.

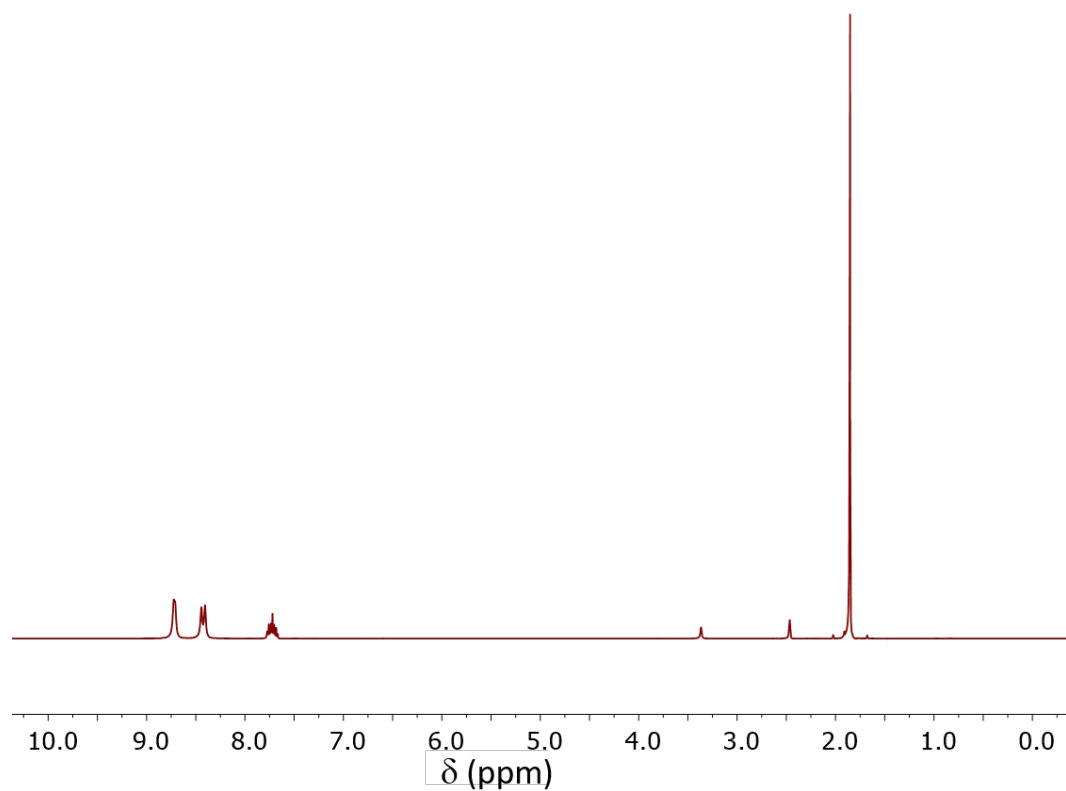

**Figure S5.**  $^1\text{H}$ -NMR spectrum of FASnI<sub>3</sub> with 1 equivalent of DMS.

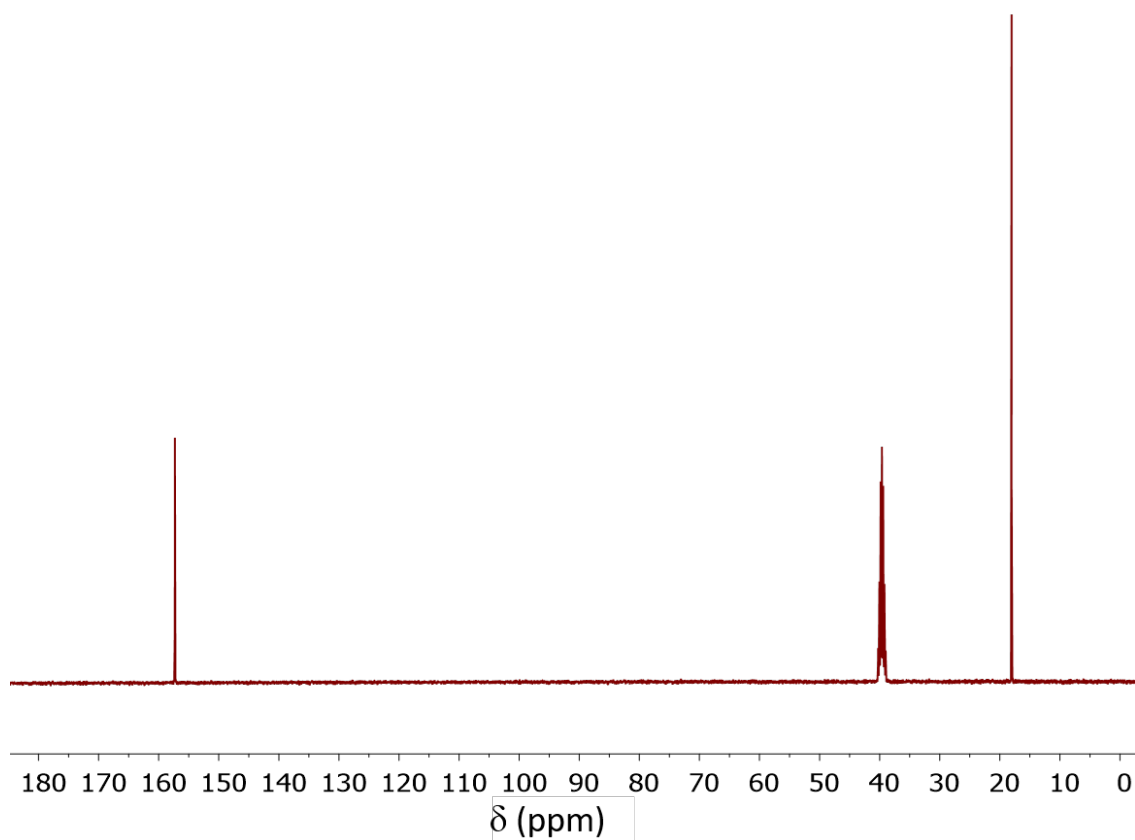

**Figure S6.**  $^{13}\text{C}$ -NMR spectrum of  $\text{FASnI}_3$  with 1 equivalent of DMS.

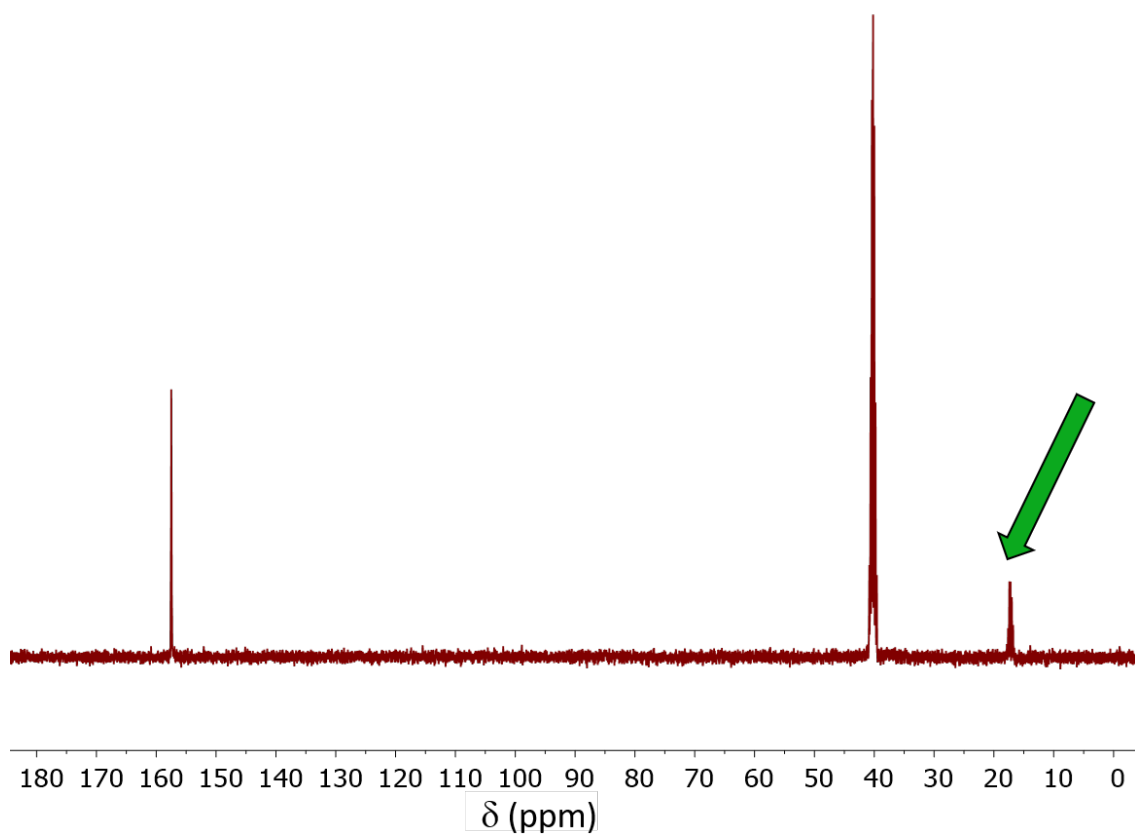

**Figure S7.**  $^{13}\text{C}$ -NMR spectrum of  $\text{FASnI}_3$  heated at  $100^\circ\text{C}$  for 30 min in DMSO at 1M. The green arrow highlights the peak of DMS originating from heating the solution.

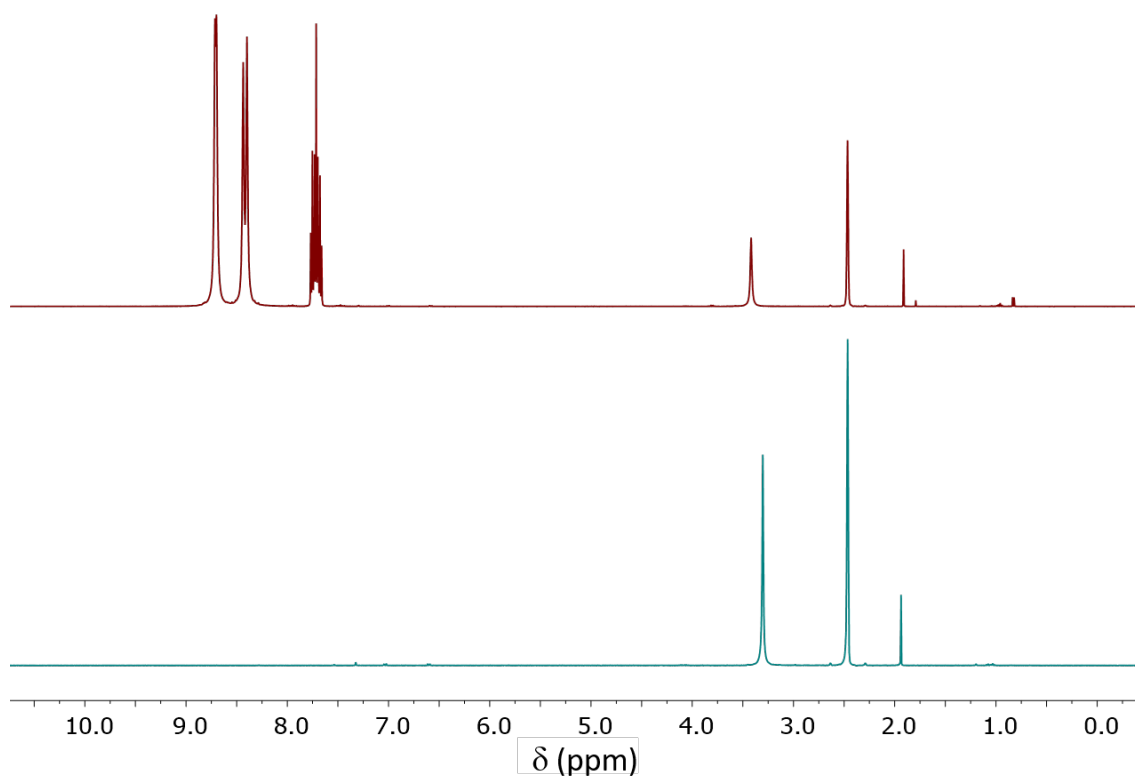

**Figure S8.**  $^1\text{H}$ -NMR spectrum of  $\text{FASnI}_3$  (red) and  $\text{SnI}_2$  (turquoise), with the DMS peak at 1.90 ppm.

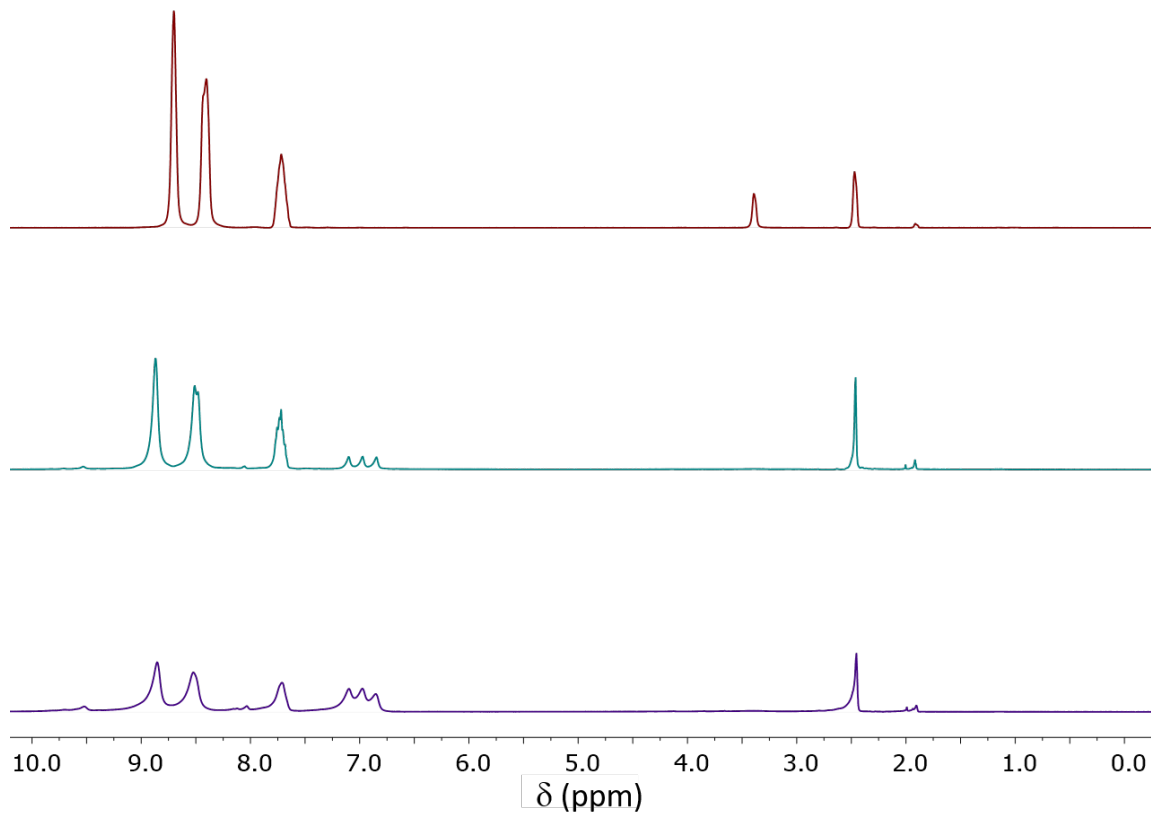

**Figure S9.**  $^1\text{H}$ -NMR spectra of  $\text{FASnI}_3$  solution in DMSO without heating (red) and heated at  $100^\circ\text{C}$  for 2 (turquoise) and 4 days (purple).

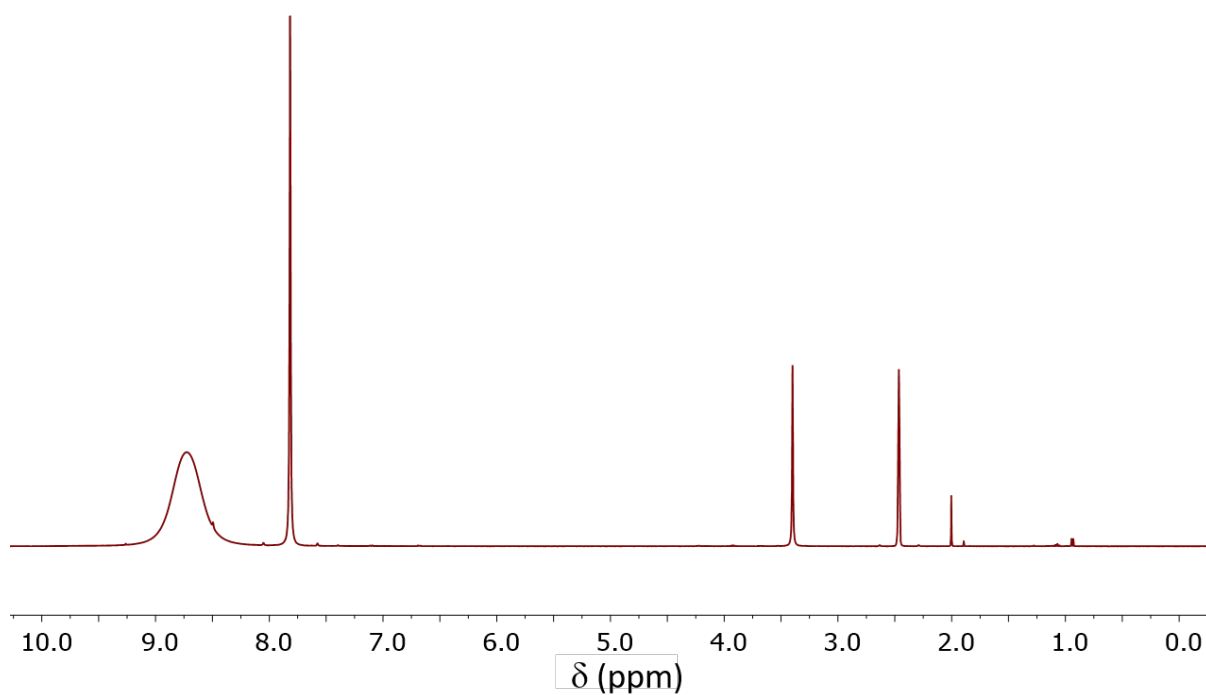

**Figure S10.**  $^1\text{H}$ -NMR spectra of FAI solution in DMSO at 1 M after heating the solution at  $100^\circ\text{C}$  for 30 min.

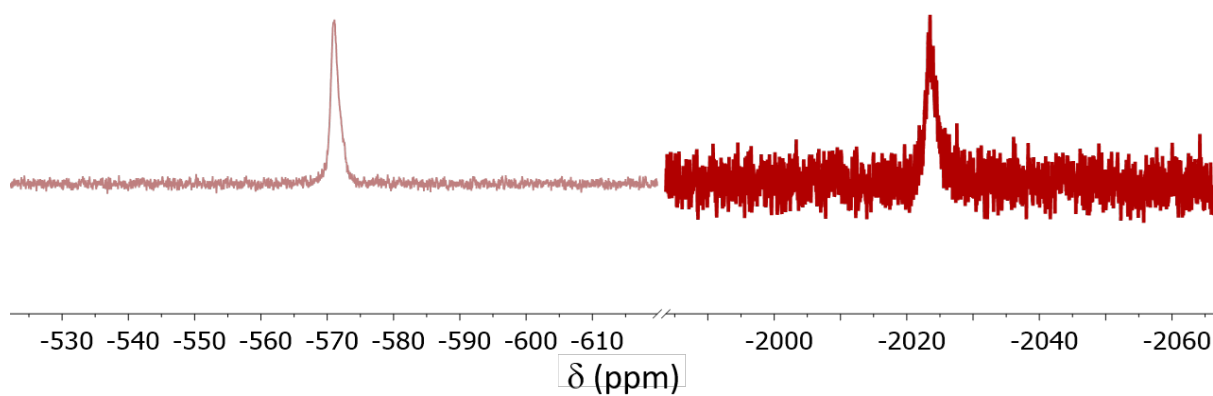

**Figure S11.**  $^{119}\text{Sn}$ -NMR spectra of  $\text{FASnI}_3$  in DMSO after adding 10% mol of  $\text{I}_2$  beads.

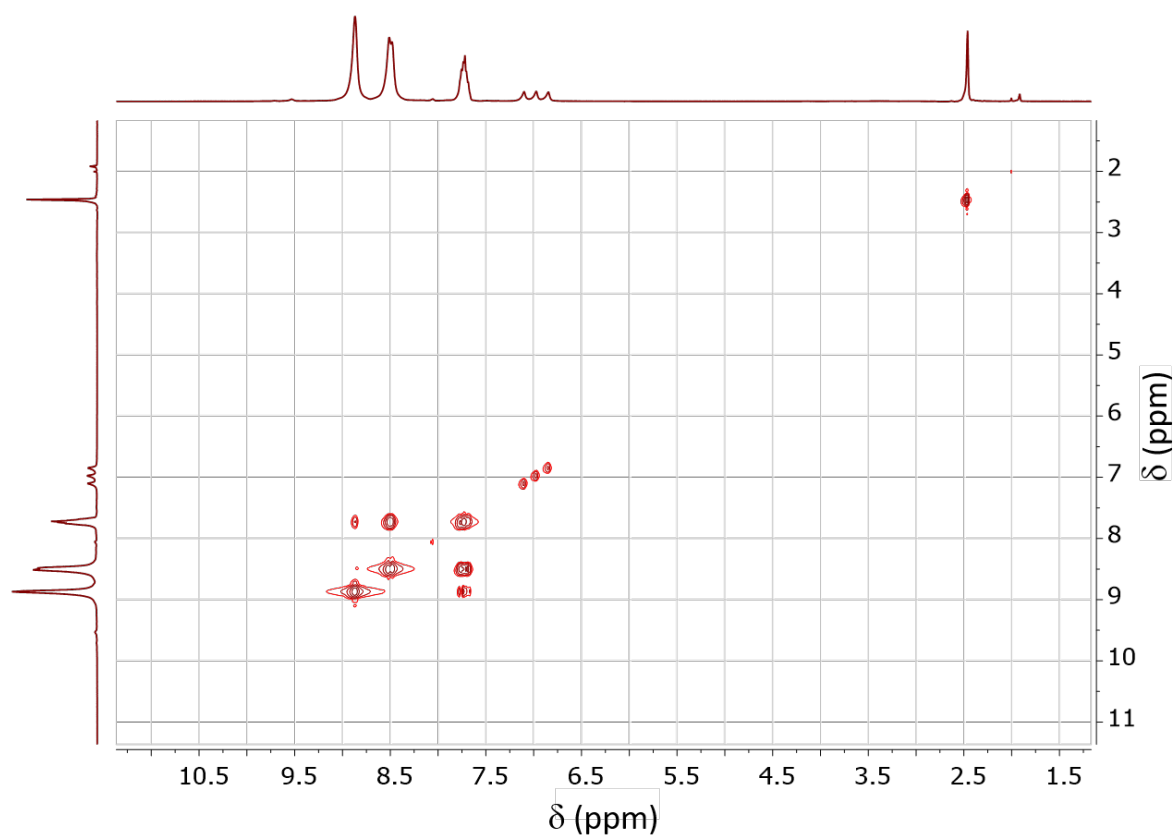

**Figure S12.**  $^1\text{H}$ - $^1\text{H}$  COSY spectrum of  $\text{FASnI}_3$  solution in DMSO heated at  $100^\circ\text{C}$  for 2 days.

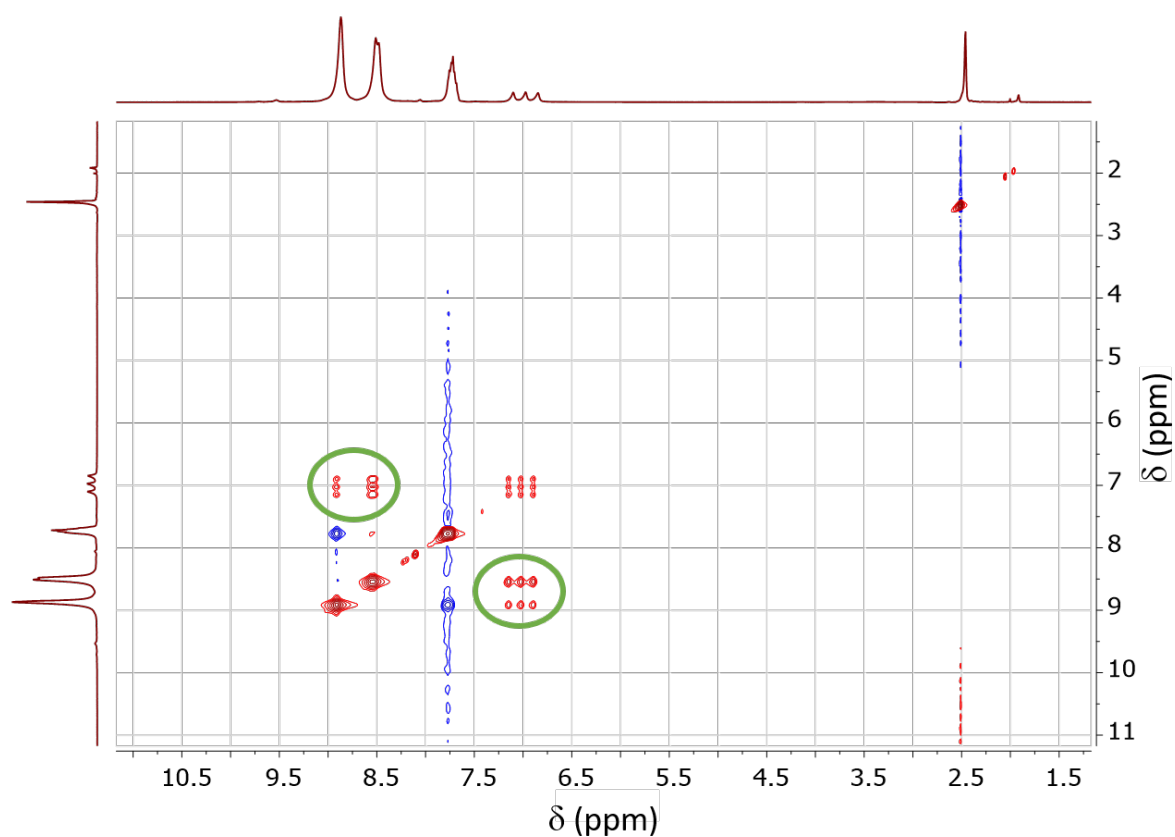

**Figure S13.**  $^1\text{H}$ - $^1\text{H}$  ROESY spectrum of  $\text{FASnI}_3$  solution in DMSO heated at  $100^\circ\text{C}$  for 2 days. Green circles point to the chemical exchange between  $\text{NH}_4^+$  and FA protons.

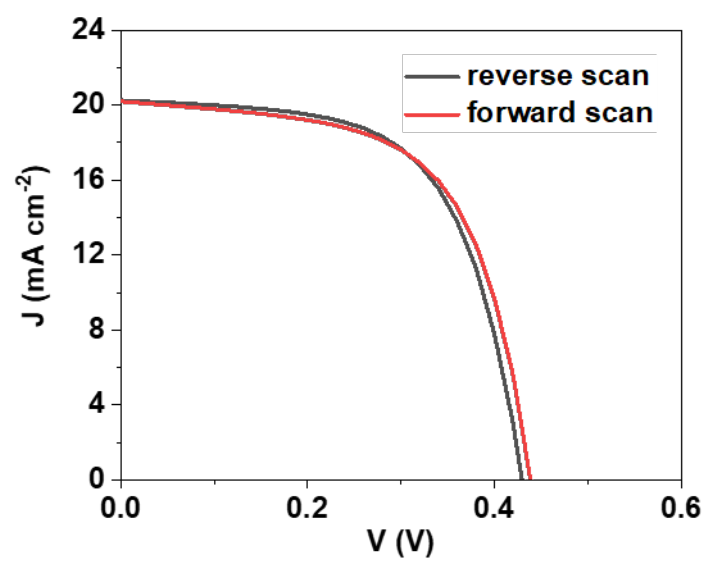

**Figure S14.**  $J$ - $V$  curve (reverse and forward scans) of a standard  $\text{FASnI}_3$  (10%  $\text{SnF}_2$ )-based perovskite solar cell processed with DMSO.
